# Supplementary material
Source: PubMed Central journal article supplement (PMC5470496)
Supplement: jamaophthalmol-135-355-s001.pdf [file jamaophthalmol-135-355-s001.pdf]

## Supplementary Online Content

Wakamatsu TH, Ueta M, Tokunaga K, et al. Human leukocyte antigen class I genes associated with Stevens-Johnson syndrome and severe ocular complications following use of cold medicines in a Brazilian population. *JAMA Ophthalmol*. Published online March 9, 2017.  
doi:10.1001/jamaophthalmol.2017.0074

**eTable 1.** Association Analysis Between HLA Class 1 Types and SJS/TEN With SOC

**eTable 2.** HLA-A Analysis With Brazilian CM-SJS/TEN With SOC

**eTable 3.** HLA-B Analysis With Brazilian CM-SJS/TEN With SOC

**eTable 4.** HLA-C Analysis With Brazilian CM-SJS/TEN With SOC

**eTable 5.** Significant Thresholds of the HLA Alleles in the Permutation Test

This supplementary material has been provided by the authors to give readers additional information about their work.

**eTable 1. Association Analysis Between HLA Class 1 Types and SJS/TEN With SOC**

| HLA Genotype   | Carrier-frequency |                   |         |                        | Gene-frequency    |                   |         |                        |
|----------------|-------------------|-------------------|---------|------------------------|-------------------|-------------------|---------|------------------------|
|                | SJS<br>(N=74)     | Normal<br>(N=133) | p value | Odds Ratio<br>(95% CI) | SJS<br>(N=148)    | Normal<br>(N=266) | p value | Odds Ratio<br>(95% CI) |
| <b>HLA-A</b>   |                   |                   |         |                        |                   |                   |         |                        |
| <b>A*01:01</b> | 5.4%<br>(4/74)    | 15.0%<br>(20/133) | 0.042   | 0.32<br>(0.11-0.98)    | 2.7%<br>(4/148)   | 8.3%<br>(22/266)  | 0.033   | 0.31<br>(0.10-0.91)    |
| <b>A*02:02</b> | 12.2%<br>(9/74)   | 3.8%<br>(5/133)   | 0.039   | 3.54<br>(1.1-11.0)     | 6.8%<br>(10/148)  | 1.9%<br>(5/266)   | 0.024   | 3.8<br>(1.3-11.3)      |
| <b>A*66:01</b> | 10.8%<br>(8/74)   | 0.8%<br>(1/133)   | 0.0013  | 16.0<br>(2.0-131)      | 5.60%<br>(8/148)  | 0.40%<br>(1/266)  | 0.0015  | 15.1<br>(1.9-122)      |
| <b>HLA-B</b>   |                   |                   |         |                        |                   |                   |         |                        |
| <b>B*07:02</b> | 4.1%<br>(3/74)    | 12.8%<br>(17/133) | 0.050   | 0.29<br>(0.082-1.0)    | 2.0%<br>(3/148)   | 6.8%<br>(18/266)  | 0.037   | 0.29<br>(0.083-0.98)   |
| <b>B*08:01</b> | 4.1%<br>(3/74)    | 15.0%<br>(20/133) | 0.020   | 0.24<br>(0.068-0.83)   | 2.0%<br>(3/148)   | 7.9%<br>(21/266)  | 0.015   | 0.24<br>(0.071-0.82)   |
| <b>B*15:17</b> | 4.1%<br>(3/74)    | 0.0%<br>(0/133)   | 0.044   | 13.1*<br>(0.67-257)    | 2.00%<br>(3/148)  | 0.0%<br>(0/266)   | 0.045   | 12.8*<br>(0.66-250)    |
| <b>B*38:01</b> | 8.1%<br>(6/74)    | 1.5%<br>(2/133)   | 0.026   | 5.78<br>(1.1-29.4)     | 4.1%<br>(6/148)   | 0.8%<br>(2/266)   | 0.027   | 5.6<br>(1.1-28.0)      |
| <b>B*44:03</b> | 24.3%<br>(18/74)  | 11.3%<br>(15/133) | 0.018   | 2.53<br>(1.2-5.4)      | 12.8%<br>(19/148) | 5.6%<br>(15/266)  | 0.014   | 2.5<br>(1.2-5.0)       |
| <b>HLA-C</b>   |                   |                   |         |                        |                   |                   |         |                        |
| <b>C*04:01</b> |                   |                   |         |                        | 27.0%<br>(40/148) | 16.2%<br>(43/266) | 0.01    | 1.92<br>(1.2\3.1)      |
| <b>C*07:02</b> | 8.1%<br>(6/74)    | 18.8%<br>(25/133) | 0.043   | 0.38<br>(0.15-0.98)    | 4.1%<br>(6/148)   | 10.9%<br>(29/266) | 0.016   | 0.35<br>(0.14-0.85)    |
| <b>C*12:03</b> | 14.9%<br>(11/74)  | 3.8%<br>(5/133)   | 0.0061  | 4.5<br>(1.5-13.4)      | 8.1%<br>(12/148)  | 1.9%<br>(5/266)   | 0.0035  | 4.6<br>(1.6-13.3)      |

\*, Woolf's correction

p value; fisher exact test

OR; odds ratio

CI; confidence interval

**eTable 2. HLA-A Analysis With Brazilian CM-SJS/TEN With SOC**

| HLA-A   | Carrier-frequency |                  |          |                         | Gene-frequency    |                  |          |                         |
|---------|-------------------|------------------|----------|-------------------------|-------------------|------------------|----------|-------------------------|
|         | CM-SJS/TEN (N=39) | Controls (N=133) | p value  | OR (95% CI)             | CM-SJS/TEN (N=78) | Controls (N=266) | p value  | OR (95% CI)             |
| A*01:01 | 5.1% (2/39)       | 15.0% (20/133)   | 0.170    |                         | 2.6% (2/78)       | 8.3% (22/266)    | 0.126    |                         |
| A*02:01 | 46.2% (18/39)     | 45.9% (61/133)   | 1.00     |                         | 25.6% (20/78)     | 25.9% (69/266)   | 1.00     |                         |
| A*02:02 | 2.6% (1/39)       | 3.8% (5/133)     | 1.00     |                         | 1.3% (1/78)       | 1.9% (5/266)     | 1.00     |                         |
| A*02:05 | 7.7% (3/39)       | 2.3% (3/133)     | 0.131    |                         | 3.8% (3/78)       | 1.1% (3/266)     | 0.133    |                         |
| A*03:01 | 20.5% (8/39)      | 12.0% (16/133)   | 0.193    |                         | 10.3% (8/78)      | 6.8% (18/266)    | 0.331    |                         |
| A*11:01 | 0.0% (0/39)       | 14.3% (19/133)   | 0.00791  | 0.0743* (0.00438 ~1.26) | 0.0% (0/78)       | 7.1% (19/266)    | 0.00976  | 0.0808* (0.00483 ~1.35) |
| A*23:01 | 10.3% (4/39)      | 9.8% (13/133)    | 1.00     |                         | 5.1% (4/78)       | 4.9% (13/266)    | 1.00     |                         |
| A*24:02 | 5.1% (2/39)       | 13.5% (18/133)   | 0.253    |                         | 2.6% (2/78)       | 7.5% (20/266)    | 0.185    |                         |
| A*26:01 | 5.1% (2/39)       | 3.0% (4/133)     | 0.619    |                         | 2.6% (2/78)       | 1.5% (4/266)     | 0.622    |                         |
| A*29:02 | 10.3% (4/39)      | 9.0% (12/133)    | 0.761    |                         | 5.1% (4/78)       | 4.5% (12/266)    | 0.765    |                         |
| A*30:01 | 7.7% (3/39)       | 5.3% (7/133)     | 0.696    |                         | 3.8% (3/78)       | 3.0% (8/266)     | 0.717    |                         |
| A*30:02 | 5.1% (2/39)       | 3.0% (4/133)     | 0.619    |                         | 2.6% (2/78)       | 1.5% (4/266)     | 0.622    |                         |
| A*31:01 | 10.3% (4/39)      | 9.8% (13/133)    | 1.00     |                         | 5.1% (4/78)       | 4.9% (13/266)    | 1.00     |                         |
| A*32:01 | 2.6% (1/39)       | 3.8% (5/133)     | 1.00     |                         | 1.3% (1/78)       | 1.9% (5/266)     | 1.00     |                         |
| A*33:03 | 2.6% (1/39)       | 3.8% (5/133)     | 1.00     |                         | 1.3% (1/78)       | 1.9% (5/266)     | 1.00     |                         |
| A*34:02 | 5.1% (2/39)       | 2.3% (3/133)     | 0.318    |                         | 2.6% (2/78)       | 1.1% (3/266)     | 0.318    |                         |
| A*36:01 | 5.1% (2/39)       | 5.3% (7/133)     | 1.00     |                         | 2.6% (2/78)       | 2.6% (7/266)     | 1.00     |                         |
| A*66:01 | 15.4% (6/39)      | 0.8% (1/133)     | 0.000575 | 24.0 (2.79 ~ 206)       | 7.7% (6/78)       | 0.4% (1/266)     | 0.000667 | 22.1 (2.62 ~ 186)       |
| A*68:01 | 7.7% (3/39)       | 6.8% (9/133)     | 0.735    |                         | 3.8% (3/78)       | 3.4% (9/266)     | 0.738    |                         |
| A*68:02 | 5.1% (2/39)       | 4.5% (6/133)     | 1.00     |                         | 2.6% (2/78)       | 2.3% (6/266)     | 1.00     |                         |
| A*74:01 | 5.1% (2/39)       | 4.5% (6/133)     | 1.00     |                         | 2.6% (2/78)       | 2.3% (6/266)     | 1.00     |                         |
| others  | 10.3% (4/39)      | 10.5% (14/133)   | 1.00     |                         | 5.1% (4/78)       | 5.3% (14/266)    | 1.00     |                         |

**eTable 3. HLA-B Analysis With Brazilian CM-SJS/TEN With SOC**

| HLA-B   | Carrier-frequency |                  |         |                     | Gene-frequency    |                  |         |                     |
|---------|-------------------|------------------|---------|---------------------|-------------------|------------------|---------|---------------------|
|         | CM-SJS/TEN (N=39) | Controls (N=133) | p value | OR (95% CI)         | CM-SJS/TEN (N=78) | Controls (N=266) | p value | OR (95% CI)         |
| B*07:02 | 2.6% (1/39)       | 12.8% (17/133)   | 0.0779  |                     | 1.3% (1/78)       | 6.8% (18/266)    | 0.0872  |                     |
| B*08:01 | 2.6% (1/39)       | 15% (20/133)     | 0.0483  | 0.149 (0.0193~1.15) | 1.3% (1/78)       | 7.9% (21/266)    | 0.0351  | 0.152 (0.0201~1.14) |
| B*13:02 | 2.6% (1/39)       | 2.3% (3/133)     | 1.00    |                     | 1.3% (1/78)       | 1.1% (3/266)     | 1.00    |                     |
| B*14:01 | 0.0% (0/39)       | 3% (4/133)       | 0.575   |                     | 0.0% (0/78)       | 1.5% (4/266)     | 0.578   |                     |
| B*15:01 | 2.6% (1/39)       | 4.5% (6/133)     | 1.00    |                     | 1.3% (1/78)       | 2.3% (6/266)     | 1.00    |                     |
| B*15:10 | 2.6% (1/39)       | 3% (4/133)       | 1.00    |                     | 1.3% (1/78)       | 1.5% (4/266)     | 1.00    |                     |
| B*18:01 | 7.7% (3/39)       | 5.3% (7/133)     | 0.696   |                     | 3.8% (3/78)       | 2.6% (7/266)     | 0.700   |                     |
| B*27:05 | 5.1% (2/39)       | 2.3% (3/133)     | 0.318   |                     | 2.6% (2/78)       | 1.1% (3/266)     | 0.318   |                     |
| B*35:01 | 10.3% (4/39)      | 13.5% (18/133)   | 0.787   |                     | 5.1% (4/78)       | 6.8% (18/266)    | 0.794   |                     |
| B*35:02 | 5.1% (2/39)       | 2.3% (3/133)     | 0.318   |                     | 2.6% (2/78)       | 1.1% (3/266)     | 0.318   |                     |
| B*35:03 | 5.1% (2/39)       | 3.0% (4/133)     | 0.619   |                     | 2.6% (2/78)       | 1.5% (4/266)     | 0.622   |                     |
| B*35:08 | 0.0% (0/39)       | 3% (4/133)       | 0.575   |                     | 0.0% (0/78)       | 1.5% (4/266)     | 0.578   |                     |
| B*38:01 | 7.7% (3/39)       | 1.5% (2/133)     | 0.0775  |                     | 3.8% (3/78)       | 0.8% (2/266)     | 0.0790  |                     |
| B*39:03 | 2.6% (1/39)       | 3.0% (4/133)     | 1.00    |                     | 1.3% (1/78)       | 1.5% (4/266)     | 1.00    |                     |
| B*40:01 | 2.6% (1/39)       | 2.3% (3/133)     | 1.00    |                     | 1.3% (1/78)       | 1.1% (3/266)     | 1.00    |                     |
| B*40:02 | 5.1% (2/39)       | 2.3% (3/133)     | 0.318   |                     | 2.6% (2/78)       | 1.1% (3/266)     | 0.318   |                     |

|         |                  |                   |        |                            |                  |                   |        |                         |
|---------|------------------|-------------------|--------|----------------------------|------------------|-------------------|--------|-------------------------|
| B*41:01 | 0.0%<br>(0/39)   | 3%<br>(4/133)     | 0.575  |                            | 0.0%<br>(0/78)   | 1.5%<br>(4/266)   | 0.578  |                         |
| B*42:01 | 5.1%<br>(2/39)   | 4.5%<br>(6/133)   | 1.00   |                            | 2.6%<br>(2/78)   | 2.3%<br>(6/266)   | 1.00   |                         |
| B*44:02 | 15.4%<br>(6/39)  | 9%<br>(12/133)    | 0.248  |                            | 9.0%<br>(7/78)   | 5.3%<br>(14/266)  | 0.279  |                         |
| B*44:03 | 25.6%<br>(10/39) | 11.3%<br>(15/133) | 0.0371 | 2.71<br>(1.11~<br>6.65)    | 14.1%<br>(11/78) | 5.6%<br>(15/266)  | 0.0250 | 2.75<br>(1.21~<br>6.26) |
| B*45:01 | 2.6%<br>(1/39)   | 3%<br>(4/133)     | 1.00   |                            | 1.3%<br>(1/78)   | 1.5%<br>(4/266)   | 1.00   |                         |
| B*49:01 | 7.7%<br>(3/39)   | 6.8%<br>(9/133)   | 0.735  |                            | 3.8%<br>(3/78)   | 3.4%<br>(9/266)   | 0.738  |                         |
| B*50:01 | 5.1%<br>(2/39)   | 1.5%<br>(2/133)   | 0.222  |                            | 2.6%<br>(2/78)   | 0.8%<br>(2/266)   | 0.222  |                         |
| B*51:01 | 5.1%<br>(2/39)   | 18.8%<br>(25/133) | 0.0448 | 0.234<br>(0.0527~<br>1.03) | 2.6%<br>(2/78)   | 9.8%<br>(26/266)  | 0.0563 |                         |
| B*52:01 | 0.0%<br>(0/39)   | 4.5%<br>(6/133)   | 0.339  |                            | 0.0%<br>(0/78)   | 2.3%<br>(6/266)   | 0.344  |                         |
| B*53:01 | 10.3%<br>(4/39)  | 9.0%<br>(12/133)  | 0.761  |                            | 5.1%<br>(4/78)   | 4.5%<br>(12/266)  | 0.765  |                         |
| B*55:01 | 2.6%<br>(1/39)   | 3.0%<br>(4/133)   | 1.00   |                            | 1.3%<br>(1/78)   | 1.5%<br>(4/266)   | 1.00   |                         |
| B*56:01 | 0.0%<br>(0/39)   | 3.0%<br>(4/133)   | 0.575  |                            | 0.0%<br>(0/78)   | 1.5%<br>(4/266)   | 0.578  |                         |
| B*57:01 | 5.1%<br>(2/39)   | 6.0%<br>(8/133)   | 1.00   |                            | 2.6%<br>(2/78)   | 3%<br>(8/266)     | 1.00   |                         |
| B*57:03 | 0.0%<br>(0/39)   | 3.0%<br>(4/133)   | 0.575  |                            | 0.0%<br>(0/78)   | 1.5%<br>(4/266)   | 0.578  |                         |
| B*58:01 | 12.8%<br>(5/39)  | 5.3%<br>(7/133)   | 0.146  |                            | 6.4%<br>(5/78)   | 2.6%<br>(7/266)   | 0.153  |                         |
| B*58:02 | 7.7%<br>(3/39)   | 4.5%<br>(6/133)   | 0.426  |                            | 3.8%<br>(3/78)   | 2.3%<br>(6/266)   | 0.429  |                         |
| others  | 25.6%<br>(10/39) | 19.5%<br>(26/133) | 0.5018 |                            | 12.8%<br>(10/78) | 10.5%<br>(28/266) | 0.5435 |                         |

**eTable 4. HLA-C Analysis With Brazilian CM-SJS/TEN With SOC**

| HLA-C   | Carrier-frequency |                  |         |                  | Gene-frequency    |                  |         |                  |
|---------|-------------------|------------------|---------|------------------|-------------------|------------------|---------|------------------|
|         | CM-SJS/TEN (N=39) | Controls (N=133) | p value | OR (95% CI)      | CM-SJS/TEN (N=78) | Controls (N=266) | p value | OR (95% CI)      |
| C*01:02 | 2.6% (1/39)       | 6.0% (8/133)     | 0.686   |                  | 1.3% (1/78)       | 3.0% (8/266)     | 0.690   |                  |
| C*02:02 | 10.3% (4/39)      | 7.5% (10/133)    | 0.524   |                  | 6.4% (5/78)       | 3.8% (10/266)    | 0.345   |                  |
| C*03:02 | 2.6% (1/39)       | 4.5% (6/133)     | 1.00    |                  | 1.3% (1/78)       | 2.3% (6/266)     | 1.00    |                  |
| C*03:03 | 5.1% (2/39)       | 8.3% (11/133)    | 0.735   |                  | 2.6% (2/78)       | 4.1% (11/266)    | 0.740   |                  |
| C*03:04 | 5.1% (2/39)       | 8.3% (11/133)    | 0.735   |                  | 2.6% (2/78)       | 4.5% (12/266)    | 0.744   |                  |
| C*04:01 | 38.5% (15/39)     | 30.8% (41/133)   | 0.438   |                  | 23.1% (18/78)     | 16.2% (43/266)   | 0.178   |                  |
| C*05:01 | 17.9% (7/39)      | 7.5% (10/133)    | 0.0687  |                  | 9.0% (7/78)       | 4.5% (12/266)    | 0.157   |                  |
| C*06:02 | 23.1% (9/39)      | 11.3% (15/133)   | 0.0702  |                  | 11.5% (9/78)      | 6.0% (16/266)    | 0.133   |                  |
| C*07:01 | 25.6% (10/39)     | 32.3% (43/133)   | 0.555   |                  | 15.4% (12/78)     | 18.0% (48/266)   | 0.734   |                  |
| C*07:02 | 12.8% (5/39)      | 18.8% (25/133)   | 0.477   |                  | 6.4% (5/78)       | 10.9% (29/266)   | 0.287   |                  |
| C*07:04 | 0.0% (0/39)       | 3.0% (4/133)     | 0.575   |                  | 0.0% (0/78)       | 1.5% (4/266)     | 0.578   |                  |
| C*08:02 | 0.0% (0/39)       | 5.3% (7/133)     | 0.353   |                  | 0.0% (0/78)       | 2.6% (7/266)     | 0.357   |                  |
| C*12:03 | 17.9% (7/39)      | 3.8% (5/133)     | 0.00613 | 5.60 (1.67~18.8) | 10.3% (8/78)      | 1.9% (5/266)     | 0.00242 | 5.97 (1.89~18.8) |
| C*14:02 | 0.0% (0/39)       | 4.5% (6/133)     | 0.339   |                  | 0.0% (0/78)       | 2.3% (6/266)     | 0.344   |                  |
| C*15:02 | 5.1% (2/39)       | 9.8% (13/133)    | 0.525   |                  | 2.6% (2/78)       | 4.9% (13/266)    | 0.535   |                  |
| C*16:01 | 7.7% (3/39)       | 11.3% (15/133)   | 0.767   |                  | 3.8% (3/78)       | 5.6% (15/266)    | 0.773   |                  |
| C*17:01 | 5.1% (2/39)       | 7.5% (10/133)    | 1.00    |                  | 2.6% (2/78)       | 3.8% (10/266)    | 1       |                  |
| others  | 2.6% (1/39)       | 8.3% (11/133)    | 0.302   |                  | 1.3% (1/78)       | 4.1% (11/266)    | 0.31    |                  |

others include the alleles which total number <4. \*; Woolf's correction; p value; fisher exact test; OR; odds ratio; CI; confidence interval.

**eTable 5. Significant Thresholds of the HLA Alleles in the Permutation Test**

| HLA   | all CM-SJS/TEN    |                | Pardo Caucasian CM-SJS/TEN |                | European ancestry CM-SJS/TEN |                |
|-------|-------------------|----------------|----------------------------|----------------|------------------------------|----------------|
|       | Carrier-frequency | Gene-frequency | Carrier-frequency          | Gene-frequency | Carrier-frequency            | Gene-frequency |
| HLA-A | 0.00588           | 0.00514        | 0.00766                    | 0.00679        | 0.00815                      | 0.00908        |
| HLA-B | 0.00405           | 0.00267        | 0.00766                    | 0.00831        | 0.00815                      | 0.00908        |
| HLA-C | 0.00671           | 0.00514        | 0.00766                    | 0.00679        | 0.00815                      | 0.00657        |
